# Supplementary material
Source: PubMed Central journal article supplement (PMC7921505)
Supplement: mmc1.pdf [file mmc1.pdf]

## Supplemental Material

**Supplemental Figure 1:** DICE scores separated by ethnic group. DICE scores are plotted for patients with a White, Black, Hispanic or Asian ethnicity. Groups were compared using the Mann Whitney test.

**Supplemental Figure 2:** The area under the receiver-operator characteristic (ROC) curve (AUC) of COVID-GRAM predicting ICU admission, mechanical ventilation requirement, or death in the derivation (a) and validation (b) cohorts.

**Supplemental Figure 3:** The area under the receiver-operator characteristic (ROC) curve (AUC) of modified SOFA score (black text) vs. DICE (orange text) in predicting death in the entire cohort.

**Supplemental Table 1:** Baseline and admission characteristics of patients who were either DNI or CMO at the time of admission.

**Supplemental Table 2:** Causes of death in patients with COVID-19.

**Supplemental Table 3:** Baseline and admission characteristics of patients within the derivation cohort.

**Supplemental Table 4:** Comparison of baseline and admission characteristics of patients within the derivation and validation cohorts.

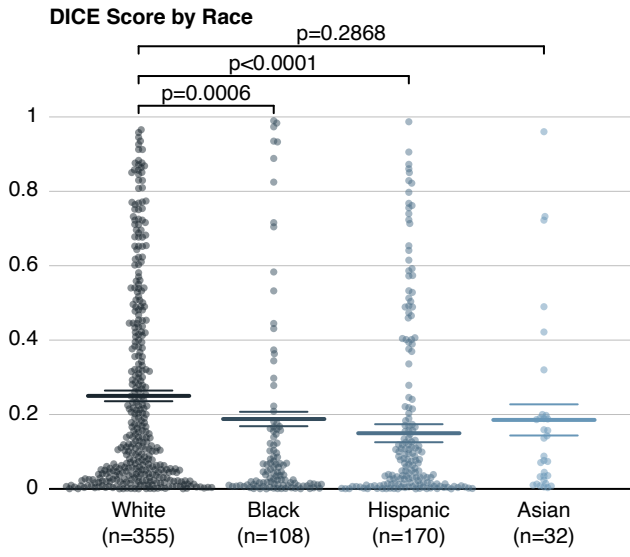

**Supplemental Figure 1**

**a** Derivation cohort

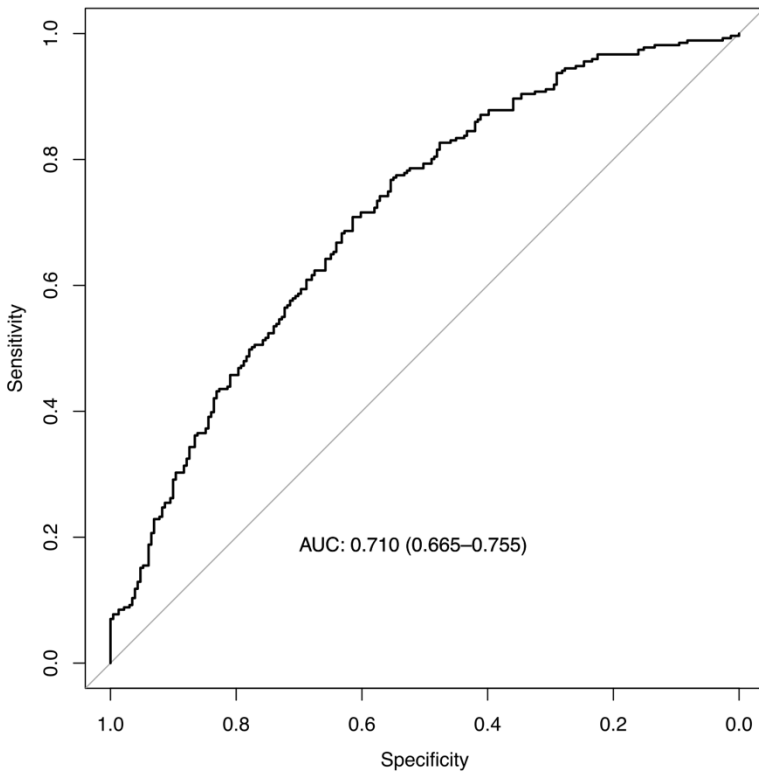

**b** Validation cohort

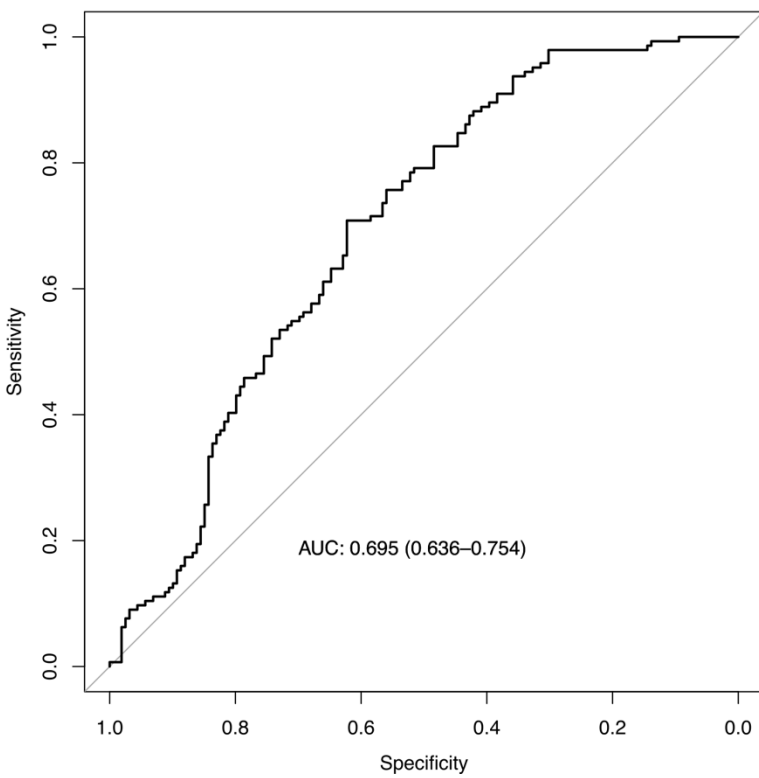

**Supplemental Figure 2**

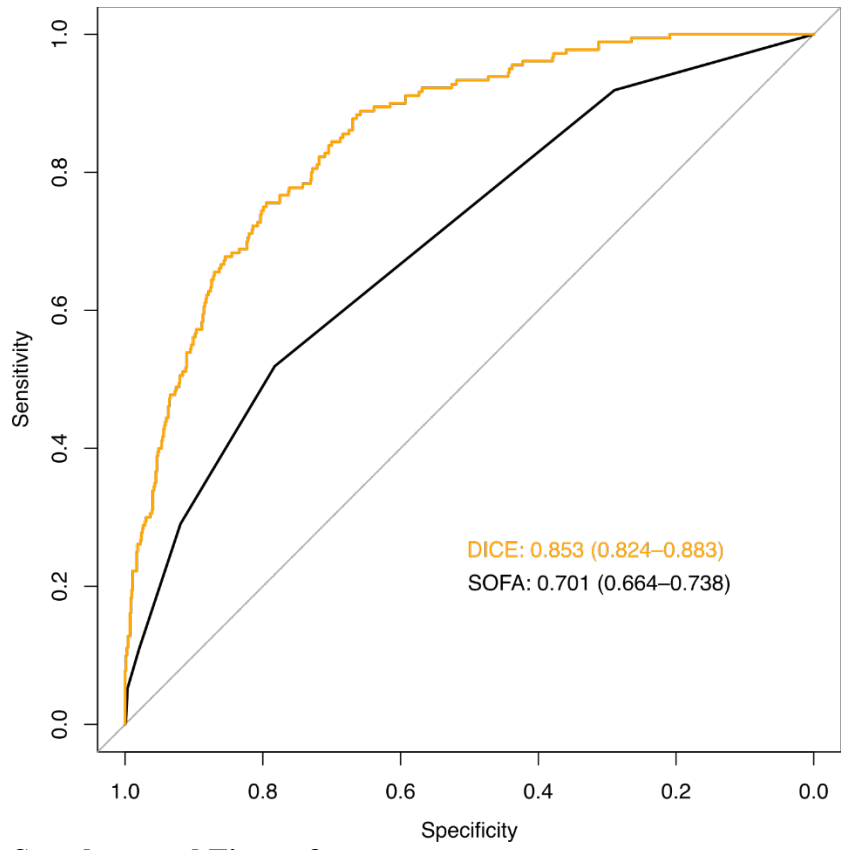

**Supplemental Figure 3**

**Supplemental Table 1. Baseline and admission characteristics of patients who were either DNI or CMO at the time of admission.**

| <b>Characteristic</b>       | <b>All patients excluding CMO</b> | <b>Deceased</b> | <b>Excluded due to DNI status</b> | <b>Excluded due to CMO</b> |
|-----------------------------|-----------------------------------|-----------------|-----------------------------------|----------------------------|
| Total patients              | 1042                              | 210             | 91                                | 95                         |
| Median (IQR) Age (years)    | 64 (53-75)                        | 76 (66-82)      | 78 (72-85)                        | 84 (77-91)                 |
| Male Sex (%)                | 592 (56.8)                        | 139 (66.2)      | 44 (48.4)                         | 44 (46.3)                  |
| <b>Race, No. (%)*</b>       |                                   |                 |                                   |                            |
| White                       | 438 (42.0)                        | 117 (26.7)      | 66 (15.1)                         | 63 (12.6)                  |
| Black                       | 187 (17.9)                        | 37 (19.8)       | 12 (6.4)                          | 14 (7.0)                   |
| Hispanic                    | 113 (10.8)                        | 17 (15.0)       | 4 (3.5)                           | 4 (3.4)                    |
| Asian                       | 37 (3.6)                          | 4 (10.8)        | 4 (10.8)                          | 4 (9.8)                    |
| Other/Mix                   | 177 (17.0)                        | 17 (9.6)        | 2 (1.1)                           | 6 (3.3)                    |
| Not recorded                | 90 (8.6)                          | 18 (20.0)       | 3 (3.3)                           | 4 (4.3)                    |
| <b>Comorbidity, No. (%)</b> |                                   |                 |                                   |                            |
| Diabetes                    | 443 (42.5)                        | 111 (52.9)      | 46 (50.5)                         | 31 (32.6)                  |
| Coronary artery disease     | 182 (17.5)                        | 59 (28.1)       | 37 (40.7)                         | 35 (36.8)                  |
| Hypertension                | 588 (56.4)                        | 142 (67.6)      | 69 (75.8)                         | 71 (74.7)                  |
| Chronic kidney disease      | 174 (16.7)                        | 59 (28.1)       | 31 (34.1)                         | 27 (28.4)                  |
| COPD                        | 123 (11.8)                        | 45 (21.4)       | 25 (27.5)                         | 23 (24.2)                  |
| Cancer                      | 166 (15.9)                        | 53 (25.2)       | 30 (33.0)                         | 93 (97.9)                  |

**Supplemental Table 2. Causes of death in patients with COVID-19.**

| <b>Causes of Mortality</b>       | <b>No. of patients (%)</b> |
|----------------------------------|----------------------------|
| Respiratory                      | 168 (80.0)                 |
| Sepsis/MOF                       | 20 (9.5)                   |
| Respiratory and Sepsis/MOF       | 8 (3.8)                    |
| Cardiac                          | 7 (3.3)                    |
| Renal Failure                    | 3 (1.4)                    |
| Respiratory and Renal Failure    | 2 (1)                      |
| Cerebral Hemorrhage              | 1 (0.5)                    |
| Renal Failure and Encephalopathy | 1 (0.5)                    |

MOF= multi-organ failure; Cardiac includes cardiogenic shock, myocardial infarction, and cardiac arrest.

**Supplement Table 3. Baseline Characteristics of the MGH Cohort Stratified by Need for Mechanical Ventilation or by In-Hospital Mortality.**

| Characteristic                           | All patients | Ventilation Status |             |         | Mortality   |              |         |
|------------------------------------------|--------------|--------------------|-------------|---------|-------------|--------------|---------|
|                                          |              | Not ventilated     | Ventilated  | P-Value | Discharged  | Deceased     | P-Value |
| Total patients                           | 578          | 284 (53.9)         | 243 (46.1)  | NA      | 467 (80.8)  | 111 (19.2)   | NA      |
| Median (IQR) Age (years)                 | 62 (51-73)   | 59 (50-70)         | 62 (49-72)  | 0.341   | 58 (48-69)  | 76 (67-83)   | <0.001  |
| Male Sex (%)                             | 346 (59.9)   | 160 (56.3)         | 158 (65.0)  | 0.043   | 268 (57.4)  | 78 (70.3)    | 0.014   |
| <b>Admission measures, Mean (SEM)</b>    |              |                    |             |         |             |              |         |
| Weight (kg)                              | 84.0 (0.8)   | 82.9 (1.1)         | 85.9 (1.4)  | 0.089   | 84.2 (0.9)  | 83.3 (2.1)   | 0.691   |
| BMI (kg/m <sup>2</sup> )                 | 30.3 (0.3)   | 29.9 (0.4)         | 30.8 (0.5)  | 0.128   | 30.4 (0.3)  | 29.9 (0.7)   | 0.519   |
| Temperature > 38°C, No. (%)              | 72 (12.5)    | 30 (10.6)          | 41 (16.9)   | 0.068   | 61 (13.1)   | 11 (9.9)     | 0.345   |
| HR (beats/min)                           | 87.5 (0.7)   | 85.4 (1.0)         | 90.0 (1.3)  | 0.004   | 86.9 (0.8)  | 89.1 (2.0)   | 0.106   |
| Systolic BP, mmHg                        | 128.4 (0.9)  | 131.2 (1.3)        | 126.3 (1.5) | 0.015   | 129.1 (1.1) | 125.7 (2.1)  | 0.156   |
| Diastolic BP, mmHg                       | 69.6 (0.5)   | 70.9 (0.7)         | 68.9 (0.8)  | 0.042   | 70.0 (0.5)  | 67.6 (1.1)   | 0.043   |
| Respiratory Rate (breaths per minute)    | 23.7 (0.3)   | 21.7 (0.3)         | 26.3 (0.5)  | <0.001  | 23.3 (0.3)  | 25.3 (0.7)   | 0.006   |
| SpO <sub>2</sub>                         | 95.5 (0.2)   | 96.1 (0.2)         | 94.7 (0.3)  | <0.001  | 95.5 (0.2)  | 95.3 (0.4)   | 0.563   |
| SpO <sub>2</sub> :FiO <sub>2</sub> Ratio | 332.9 (5.1)  | 394.7 (4.83)       | 256.3 (8.0) | <0.001  | 351.0 (5.3) | 257.5 (11.9) | <0.001  |
| <b>Comorbidities, No. (%)</b>            |              |                    |             |         |             |              |         |
| Hypertension                             | 304 (52.6)   | 143 (50.4)         | 125 (51.4)  | 0.803   | 234 (50.1)  | 70 (63.1)    | 0.015   |
| Diabetes                                 | 254 (43.9)   | 111 (39.1)         | 119 (49.0)  | 0.023   | 189 (40.5)  | 65 (58.6)    | <0.001  |
| Coronary artery disease                  | 100 (17.3)   | 42 (14.8)          | 34 (14.0)   | 0.795   | 65 (13.9)   | 35 (31.5)    | <0.001  |
| Chronic kidney disease                   | 91 (15.7)    | 45 (15.8)          | 30 (12.3)   | 0.253   | 61 (13.1)   | 30 (27.0)    | <0.001  |
| COPD                                     | 76 (13.1)    | 33 (11.6)          | 25 (10.3)   | 0.626   | 50 (10.7)   | 26 (23.4)    | <0.001  |
| Cancer                                   | 85 (14.7)    | 39 (13.7)          | 30 (12.3)   | 0.605   | 57 (12.2)   | 28 (25.2)    | <0.001  |

|                                               |               |              |               |        |               |               |        |
|-----------------------------------------------|---------------|--------------|---------------|--------|---------------|---------------|--------|
| <b>Clinical or X-ray Finding,<br/>No. (%)</b> |               |              |               |        |               |               |        |
| Dyspnea                                       | 422 (73.0)    | 184 (64.8)   | 204 (84.0)    | <0.001 | 341 (73.0)    | 81 (73.0)     | 0.774  |
| X-ray abnormality                             | 469 (81.1)    | 205 (72.2)   | 224 (92.2)    | <0.001 | 369 (79.0)    | 100 (90.1)    | 0.021  |
| <b>Home medication, No.<br/>(%)</b>           |               |              |               |        |               |               |        |
| Statin                                        | 297 (51.4)    | 147 (51.8)   | 114 (46.9)    | 0.269  | 228 (48.8)    | 69 (62.2)     | 0.01   |
| Aspirin                                       | 174 (30.1)    | 90 (31.7)    | 61 (25.1)     | 0.103  | 128 (27.4)    | 46 (41.4)     | 0.004  |
| Anticoagulant                                 | 27 (4.7)      | 9 (3.2)      | 10 (4.1)      | 0.56   | 14 (3.0)      | 13 (11.7)     | <0.001 |
| <b>Laboratory measures,<br/>Mean (SEM)</b>    |               |              |               |        |               |               |        |
| Albumin (g/dL)                                | 3.61 (0.02)   | 3.71 (0.03)  | 3.51 (0.03)   | <0.001 | 3.65 (0.02)   | 3.45 (0.05)   | <0.001 |
| ALT (U/L)                                     | 64.07 (13.05) | 40.34 (2.32) | 96.24 (30.66) | 0.002  | 55.97 (6.60)  | 97.88 (61.80) | 0.276  |
| BUN (mg/dL)                                   | 21.38 (0.77)  | 19.76 (0.96) | 22.07 (1.35)  | 0.158  | 18.76 (0.73)  | 32.35 (2.25)  | <0.001 |
| CRP (mg/L)                                    | 114.2 (3.80)  | 83.73 (4.49) | 153.3 (6.06)  | <0.001 | 109.0 (4.23)  | 135.6 (8.35)  | 0.006  |
| Creatinine (mg/dL)                            | 1.46 (0.07)   | 1.41 (0.10)  | 1.52 (0.11)   | 0.464  | 1.32 (0.07)   | 2.02 (0.20)   | <0.001 |
| D-dimer (ng/L)                                | 1866 (88.95)  | 1597 (107.5) | 2129 (158.3)  | 0.006  | 1702 (91.16)  | 2556 (249.2)  | <0.001 |
| eGFR (mL/min/1.73m <sup>2</sup> )             | 70.01 (1.26)  | 72.09 (1.74) | 70.40 (2.02)  | 0.525  | 74.69 (1.33)  | 50.42 (2.67)  | <0.001 |
| Hemoglobin (g/dl)                             | 13.18 (0.09)  | 13.04 (0.12) | 13.50 (0.13)  | 0.011  | 13.24 (0.09)  | 12.91 (0.21)  | 0.128  |
| LDH (U/L)                                     | 425.7 (30.12) | 321.8 (7.86) | 558.5 (68.05) | <0.001 | 392.6 (17.13) | 560.4 (135.7) | 0.15   |
| MCV (fL/cell)                                 | 87.36 (0.26)  | 86.87 (0.39) | 87.39 (0.36)  | 0.333  | 86.95 (0.28)  | 89.06 (0.64)  | 0.002  |
| Neut:Lymph Ratio                              | 9.17 (0.59)   | 6.58 (0.46)  | 11.92 (1.18)  | <0.001 | 7.62 (0.46)   | 15.68 (2.30)  | <0.001 |
| Platelets (×10 <sup>9</sup> /L)               | 210.3 (3.89)  | 210.4 (5.58) | 212.8 (6.05)  | 0.769  | 216.1 (4.31)  | 186.2 (8.75)  | 0.003  |
| Procalcitonin (ng/mL)                         | 1.49 (0.39)   | 0.62 (0.29)  | 2.19 (0.71)   | 0.114  | 0.81 (0.29)   | 4.27 (1.57)   | 0.012  |
| RDW (%)                                       | 13.96 (0.08)  | 13.99 (0.13) | 13.70 (0.10)  | 0.087  | 13.79 (0.09)  | 14.68 (0.18)  | <0.001 |
| Troponin T (ng/L)                             | 38.73 (3.77)  | 32.62 (5.71) | 42.74 (5.67)  | 0.228  | 31.19 (4.06)  | 69.20 (9.07)  | <0.001 |
| Troponin T>10ng/mL                            | 0.57 (0.02)   | 0.48 (0.03)  | 0.59 (0.03)   | 0.02   | 0.50 (0.02)   | 0.87 (0.03)   | <0.001 |
| WBC (×10 <sup>9</sup> /L)                     | 7.71 (0.19)   | 6.93 (0.19)  | 8.50 (0.33)   | <0.001 | 7.61 (0.21)   | 8.15 (0.39)   | 0.26   |

Statistical values are for univariate logistic regression analyses. COPD = chronic obstructive pulmonary disorder; OR = odds ratio; CI = confidence interval; SD = standard deviation; ALT = alanine aminotransferase; BUN = blood urea nitrogen; CRP = C-reactive protein; eGFR =



estimated glomerular filtration rate; LDH = lactate dehydrogenase; MCV = mean corpuscular volume; RDW = red cell distribution width; WBC = white blood cell.

**Supplemental Table 4. Baseline Characteristics of the Derivation and Validation Cohorts.**

| <b>Characteristic</b>                    | <b>Derivation Cohort</b> | <b>Validation Cohort</b> | <b>P-Value</b> |
|------------------------------------------|--------------------------|--------------------------|----------------|
| Total patients                           | 578                      | 464                      | NA             |
| Median (IQR) Age (years)                 | 62 (51-73)               | 66 (54-77)               | 0.001          |
| Male Sex (%)                             | 346 (59.9)               | 246 (53.0)               | 0.028          |
| <b>Admission measures, Mean (SEM)</b>    |                          |                          |                |
| Weight (kg)                              | 84.0 (0.8)               | 83.9 (1.0)               | 0.756          |
| BMI (kg/m <sup>2</sup> )                 | 30.3 (0.3)               | 29.5 (0.3)               | 0.111          |
| Temperature > 38°C, No. (%)              | 72 (12.5)                | 87 (18.8)                | 0.007          |
| HR (beats/min)                           | 87.5 (0.7)               | 87.0 (0.9)               | 0.759          |
| Systolic BP, mmHg                        | 128.4 (0.9)              | 129.0 (1.1)              | 0.995          |
| Diastolic BP, mmHg                       | 69.6 (0.5)               | 70.8 (0.6)               | 0.133          |
| Respiratory Rate (breaths per minute)    | 23.7 (0.3)               | 22.6 (0.3)               | <0.001         |
| SpO <sub>2</sub>                         | 95.5 (0.2)               | 95.6 (0.2)               | 0.681          |
| SpO <sub>2</sub> :FiO <sub>2</sub> Ratio | 332.9 (5.1)              | 349.4 (5.6)              | 0.028          |
| <b>Race (%<sup>*</sup>)</b>              |                          |                          |                |
| White                                    | 248 (42.9)               | 190 (40.9)               | 0.530          |
| Black                                    | 63 (10.9)                | 124 (26.7)               | <0.001         |
| Hispanic                                 | 67 (11.6)                | 46 (9.9)                 | 0.420          |
| Asian                                    | 20 (3.5)                 | 17 (3.3)                 | 0.870          |
| Other/Mix                                | 121 (20.9)               | 56 (12.1)                | <0.001         |
| Not recorded                             | 59 (10.2)                | 31 (6.7)                 |                |
| <b>Comorbidities</b>                     |                          |                          |                |
| Hypertension                             | 304 (52.6)               | 284 (61.2)               | 0.006          |
| Diabetes                                 | 254 (43.9)               | 189 (40.7)               | 0.314          |
| Coronary artery disease                  | 100 (17.3)               | 82 (17.7)                | 0.870          |
| Chronic kidney disease                   | 91 (15.7)                | 83 (17.9)                | 0.359          |
| COPD                                     | 76 (13.1)                | 47 (10.1)                | 0.148          |
| Cancer                                   | 85 (14.7)                | 81 (17.5)                | 0.234          |
| <b>Clinical or X-ray Finding</b>         |                          |                          |                |
| Dyspnea                                  | 422 (73.0)               | 317 (68.3)               | 0.062          |
| X-ray abnormality                        | 469 (81.1)               | 349 (75.2)               | 0.148          |

|                                   |               |               |        |
|-----------------------------------|---------------|---------------|--------|
| <b>Home medication</b>            |               |               |        |
| Statin                            | 297 (51.4)    | 214 (46.1)    | 0.092  |
| Aspirin                           | 174 (30.1)    | 144 (31.0)    | 0.787  |
| <b>Disease severity</b>           |               |               |        |
| Ventilated                        | 243 (42.0)    | 161 (34.7)    | 0.018  |
| Deceased                          | 111 (19.2)    | 99 (21.3)     | 0.394  |
| <b>Laboratory measures</b>        |               |               |        |
| Albumin (g/dL)                    | 3.61 (0.02)   | 3.62 (0.03)   | 0.774  |
| ALT (U/L)                         | 64.07 (13.05) | 37.75 (2.41)  | <0.001 |
| BUN (mg/dL)                       | 21.38 (0.77)  | 23.20 (0.89)  | 0.024  |
| CRP (mg/L)                        | 114.2 (3.80)  | 103.6 (4.28)  | 0.022  |
| Creatinine (mg/dL)                | 1.46 (0.07)   | 1.51 (0.10)   | 0.224  |
| D-dimer (ng/L)                    | 1866 (88.95)  | 1959 (226.8)  | 0.791  |
| eGFR (mL/min/1.73m <sup>2</sup> ) | 70.01 (1.26)  | 65.26 (1.36)  | 0.005  |
| Hemoglobin (g/dl)                 | 13.18 (0.09)  | 12.46 (0.10)  | <0.001 |
| LDH (U/L)                         | 425.7 (30.12) | 383.0 (11.13) | 0.277  |
| MCV (fL/cell)                     | 87.36 (0.26)  | 88.49 (0.31)  | 0.019  |
| Neut:Lymph Ratio                  | 9.17 (0.59)   | 8.61 (0.56)   | 0.233  |
| Platelets ( $\times 10^9/L$ )     | 210.3 (3.89)  | 219.7 (4.56)  | 0.047  |
| Procalcitonin (ng/mL)             | 1.49 (0.39)   | 1.31 (0.33)   | 0.683  |
| RDW (%)                           | 13.96 (0.08)  | 14.26 (0.09)  | 0.002  |
| Troponin T (ng/L)                 | 38.73 (3.77)  | 54.47 (7.34)  | 0.016  |
| WBC ( $\times 10^9/L$ )           | 7.71 (0.19)   | 8.28 (0.43)   | 0.755  |

Continuous variables are presented as mean (SEM), unless otherwise noted, and categorical variables are presented as n (%). Group comparisons were performed with the Mann Whitney test, as appropriate, for continuous variables and the Fisher's exact test for categorical variables.
